# Supplementary material
Source: Research Square preprint supplement (doi:10.21203/rs.3.rs-8776737/v1)

**Supplementary Materials**

Supplementary Table 1. Comparison of anthropometric and ocular biometric change rates between the control and atropine group.

Supplementary Table 2. Quantitative analysis of peak age distributions and tests for unimodality

Supplementary Fig 1. Scatter plots of height growth rate (cm/month) versus age (years) in the control and atropine groups

Supplementary Fig 2. Box plots of annual axial elongation rates (mm/year) in early and late axial elongation peak subgroups in the atropine group

**Supplementary Table 1. Comparison of anthropometric and ocular biometric change rates between the control and atropine group**

| Change rate  per month | Control (n=56, Mean±SD) | Atropine (n=83, Mean±SD) | *p*-value |
| --- | --- | --- | --- |
| Height(cm/month) | 0.494±0.136 | 0.532±0.128 | 0.10 |
| Weight(kg/month) | 0.384±0.175 | 0.366±0.152 | 0.54 |
| BMI change rate(kg/m2/month) | 0.042±0.083 | 0.041±0.066 | 0.93 |
| Axl change rate(mm/month) | 0.024±0.011 | 0.018±0.014 | <0.01* |
| ACD change rate(mm/month) | 0.002±0.002 | 0.003±0.003 | 0.02 |
| LT change rate(mm/month) | -0.001±0.003 | -0.001±0.004 | 0.61 |
| WTW change rate(mm/month) | -0.001±0.008 | 0.003±0.007 | <0.01* |
| Mean K change rate(/month) | -0.002±0.004 | -0.003±0.008 | 0.51 |
| CCT(㎛/month) | 0.188±0.238 | 0.109±0.356 | 0.12 |
| SE | -0.034±0.028 | -0.022±0.029 | 0.02* |
| ACD:anterior chamber depth; LT:lens thickness; WTW:white to white; CCT:central corneal thickness; SE:spherical equivalent; BMI:body mass index  *p<0.05 is considered as statistically significance. | | | |

**Supplementary Table 2. Quantitative analysis of peak age distributions and tests for unimodality**

| Measure | Group | Shapiro-Wilk *p*-value | Skewness | Kurtosis | Dip testa *p*-value | Levene *p*-value | K-S testb *p*-value |
| --- | --- | --- | --- | --- | --- | --- | --- |
| Height growth rate | Control | 0.106 | -0.525 | 2.726 | 0.902 | 0.836 | 0.016 |
| Height growth rate | Atropine | 0.028 | -0.059 | 2.376 | 0.051 | 0.836 | 0.016 |
| Axial elongation rate | Control | 0.376 | -0.26 | 2.478 | 0.906 | 0.672 | 0.079 |
| Axial elongation rate | Atropine | 0.478 | 0.149 | 2.586 | 0.091 | 0.672 | 0.079 |
| Dip test : Hartigan's Dip test; K-S: Kolmogorov-Smirnov test | | | | | | | |

**Supplementary Fig 1. Scatter plots of height growth rate (cm/month) versus age (years) in the control and atropine groups**

In the control group, height growth rate decreased significantly with age (β = –0.028 cm/month per year, *P* = 0.012), whereas no significant association was observed in the atropine group (β = 0.004 cm/month per year, *P* = 0.716). Lines indicate linear regression fits; shaded areas represent 95% confidence intervals.


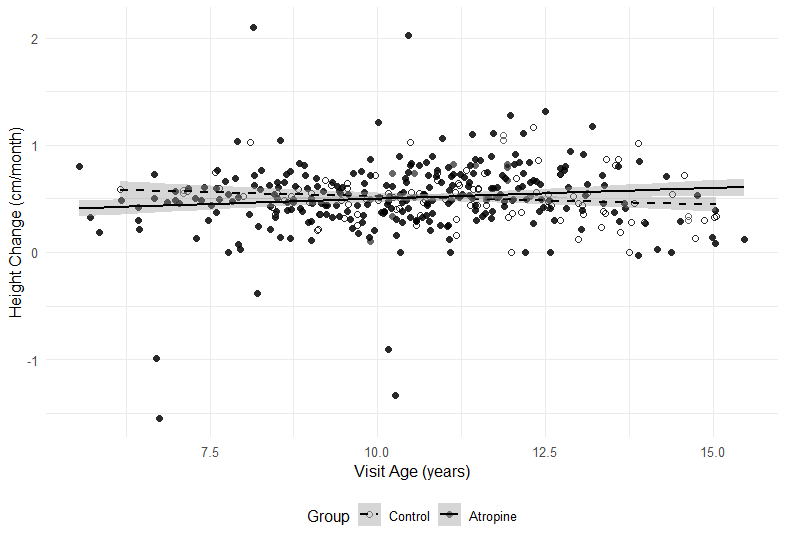


**Supplementary Fig 2. Box plots of annual axial elongation rates (mm/year) in early and late axial elongation peak subgroups in the atropine group**

Subgroups were defined according to the median peak axial elongation age (10.28 years) derived from the bimodal pattern in Figure 2. The early peak group showed significantly faster annual axial elongation (0.27 ± 0.17 mm/year) than the late peak group (0.15 ± 0.12 mm/year; *P* < 0.01) despite identical atropine dosing.


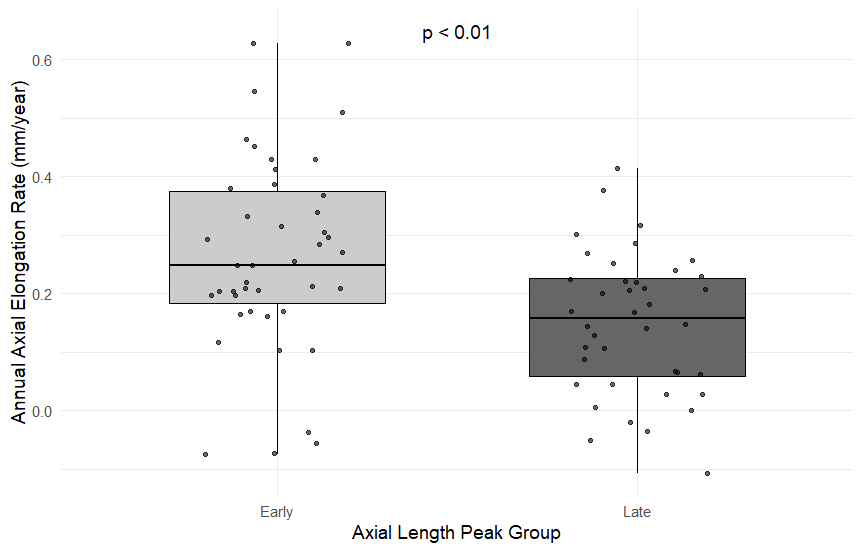

Supplement: Supplementary file 1 [file 5de8f41d8939272f2f601630.docx]
